# Supplementary material for: Multi-frame blind deconvolution using X-ray microscope images of an in-plane rotating sample
Source: PubMed Central journal article supplement — Sci Rep. 2024 Nov 29;14:29726. doi: 10.1038/s41598-024-79237-x (PMC11606970; doi:10.1038/s41598-024-79237-x), 2024-11-29
Supplement: 41598_2024_79237_MOESM4_ESM.pdf [file 41598_2024_79237_MOESM4_ESM.pdf]

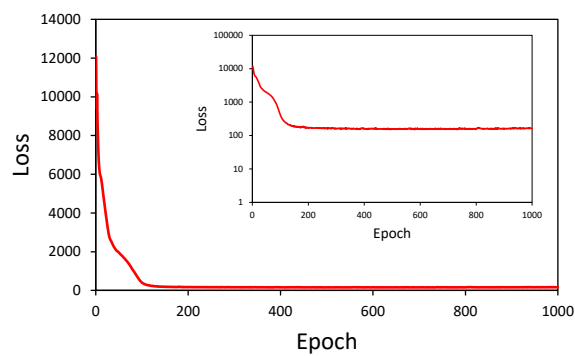

(a) For the simulation

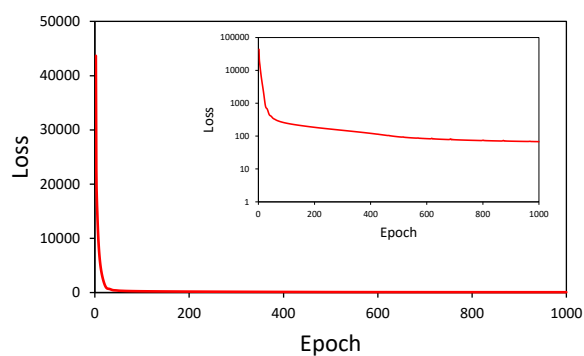

(b) For the visible light experiment

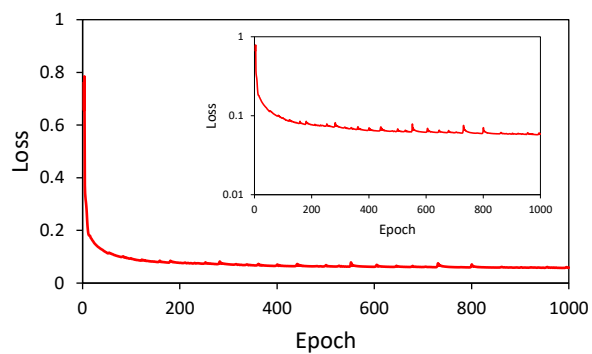

(c) For the X-ray experiment

Fig. S1 Trends of the loss function during the reconstruction. The definition of the loss function in (c) is different from that in (a) and (b).
